# Supplementary material for: Drug-Drug Interactions of Irinotecan, 5-Fluorouracil, Folinic Acid and Oxaliplatin and Its Activity in Colorectal Carcinoma Treatment
Source: PubMed Central journal article supplement (PMC7321123; doi:10.3390/molecules25112614), 2020-06-04
Supplement: molecules-25-02614-s001.pdf [file molecules-25-02614-s001.pdf]

*Supplementary information*

## **Drug-drug interactions of irinotecan, 5-fluorouracil, folinic acid and oxaliplatin and its activity in colorectal carcinoma treatment**

**Marloes Zoetemelk<sup>1,2#</sup>, George M. Ramzy<sup>1,2#</sup>, Magdalena Rausch<sup>1,2#</sup>, Patrycja Nowak-Sliwinska<sup>1,2,\*</sup>**

<sup>1</sup> Molecular Pharmacology Group, School of Pharmaceutical Sciences; Institute of Pharmaceutical Sciences of Western Switzerland, University of Geneva, 1 Rue Michel-Servet, 1211, Geneva 4, Switzerland

<sup>2</sup> Translational Research Center in Oncohaematology, 1 Rue Michel-Servet, 1211, Geneva 4, Switzerland

# Equal contribution

\* Correspondence: Patrycja Nowak-Sliwinska, 1 Rue Michel-Servet, 1211 Geneva 4, Switzerland; Tel: +41 22 379 3352, e-mail: [Patrycja.Nowak-Sliwinska@unige.ch](mailto:Patrycja.Nowak-Sliwinska@unige.ch)

**Supplementary Figure S1-S2**

**Supplementary Tables 1-2**

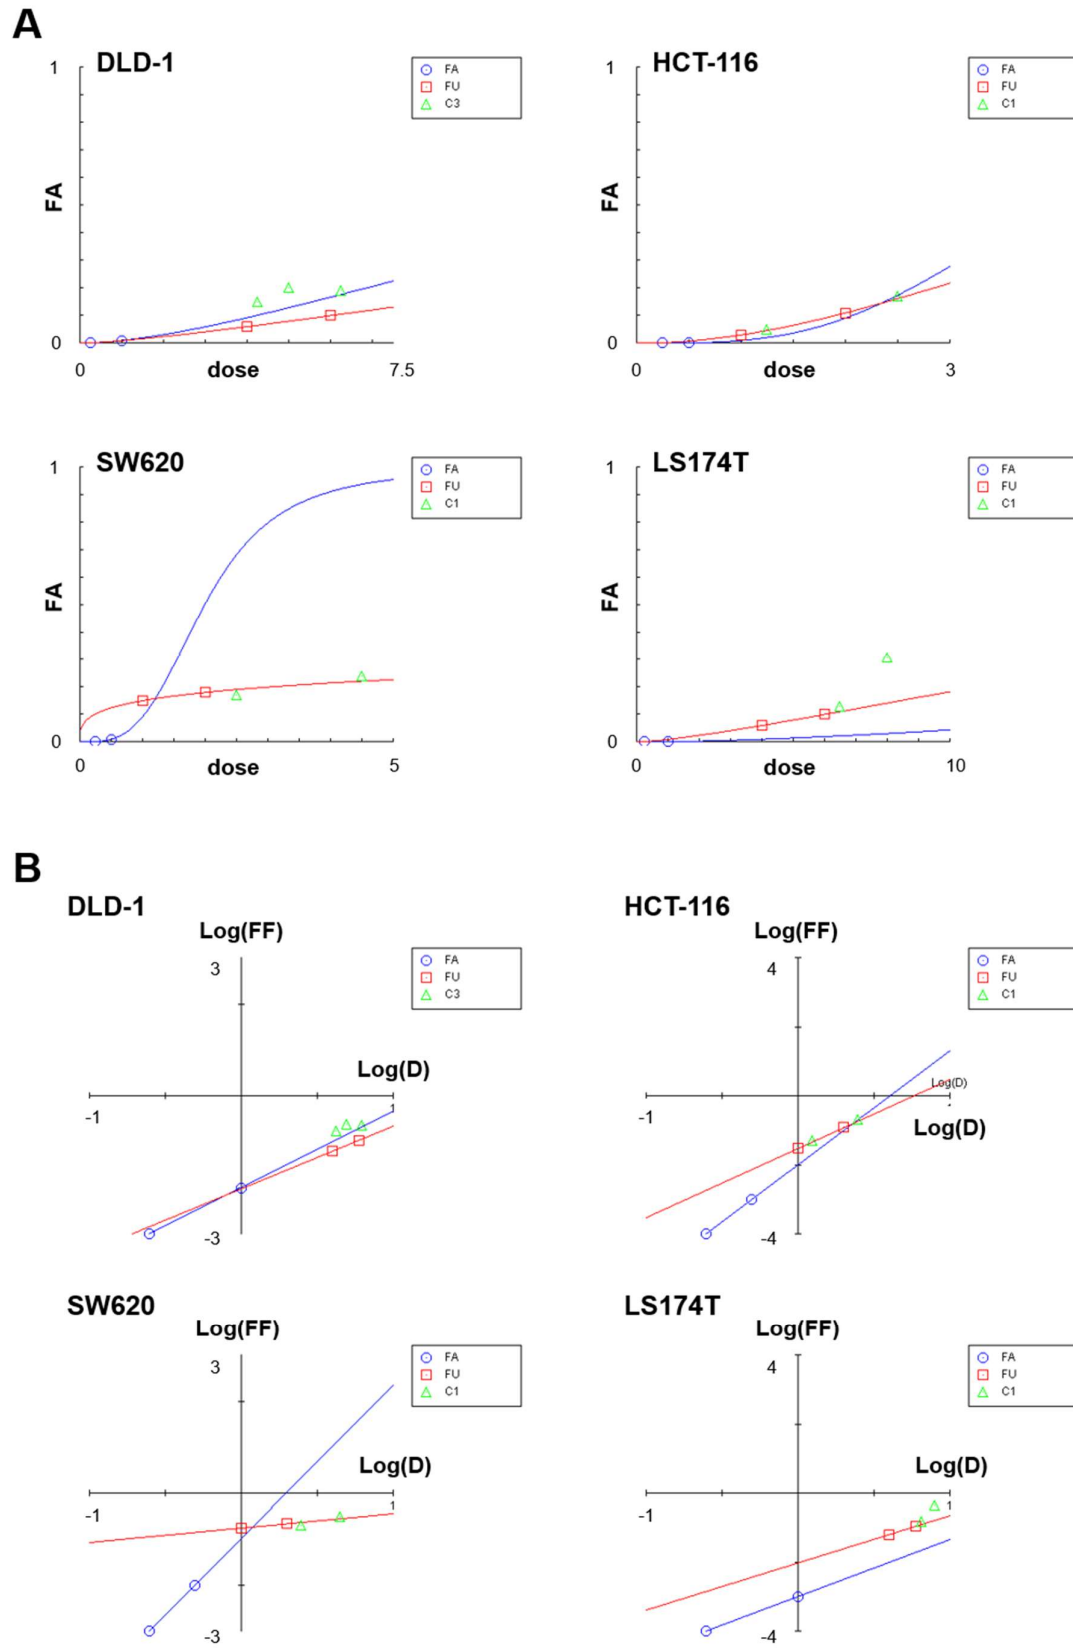

**Supplementary Figure S1.** Isobolograms of (A) dose- and (B) median effect of FA/5-FU (FF) in all CRC cell lines.

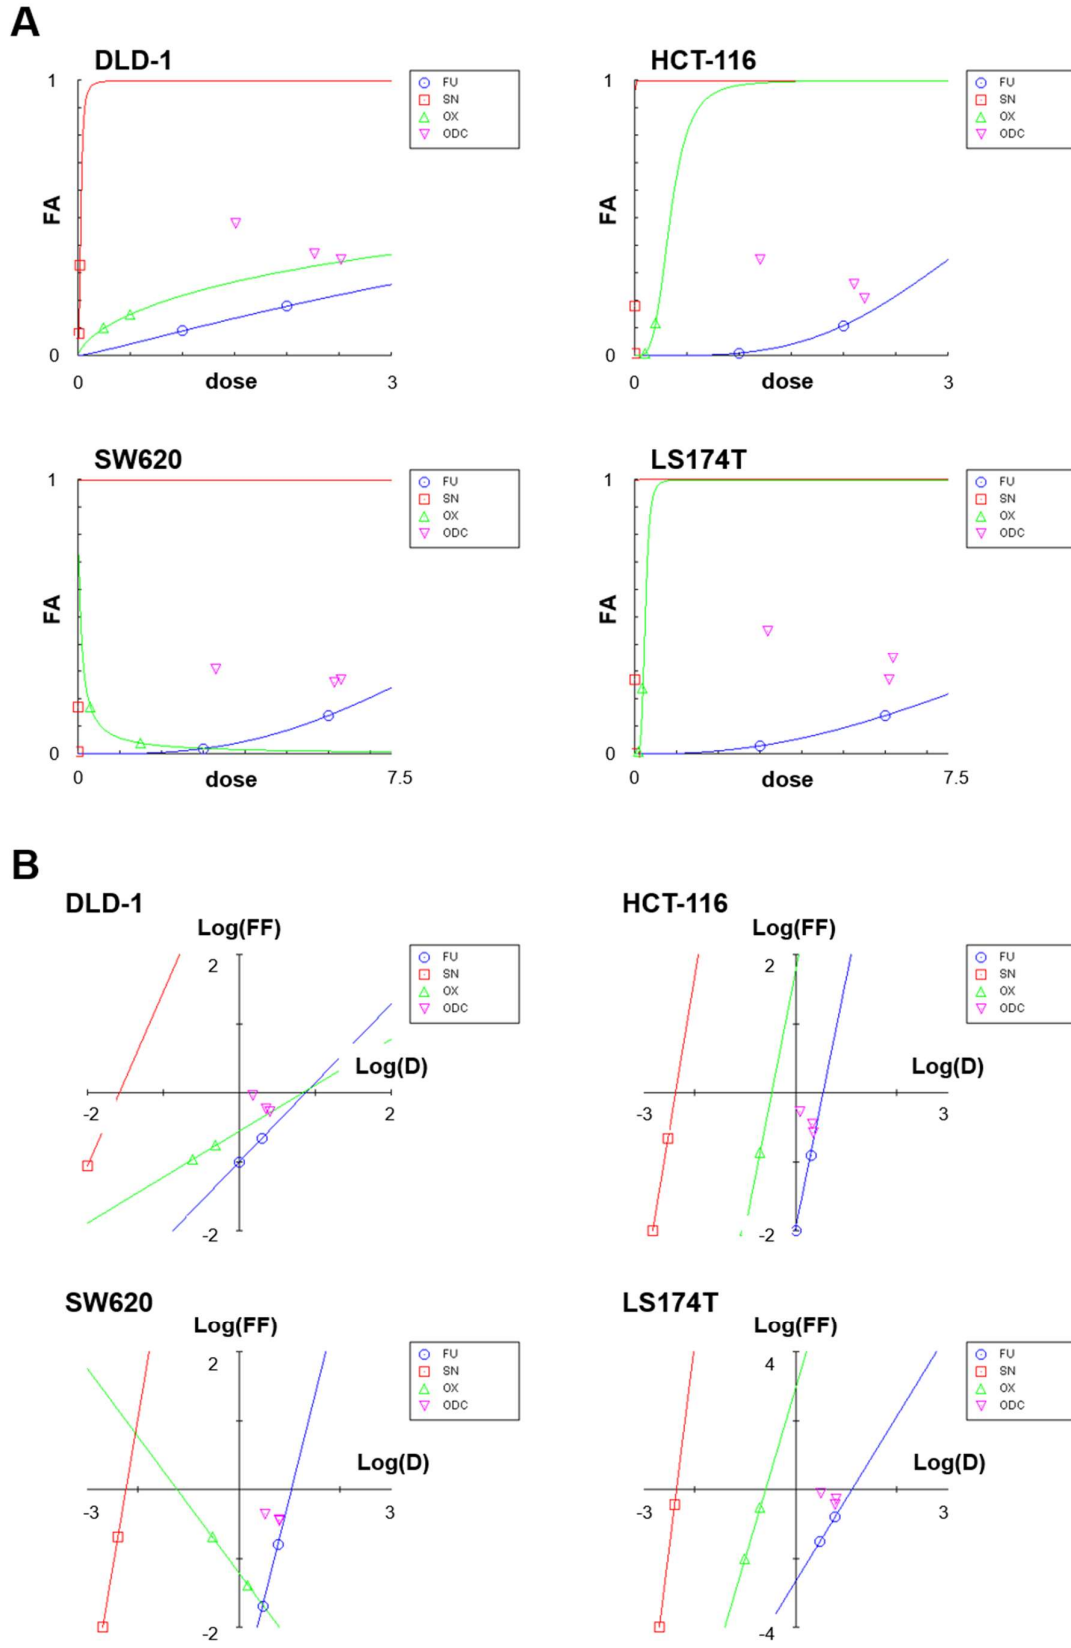

**Supplementary Figure S2.** Isobolograms of drug doses (A) and median effect (B) for FF/OX/SN in CRC cells.

**Supplementary Table 1.** Combinatory index (CI) single drug doses and effect for FA/5-FU (FF) in CRC cells.

| DLD1 CI <sub>FF</sub> |        | HCT116 CI <sub>FF</sub> |        | SW620 CI <sub>FF</sub> |        | LS174T CI <sub>FF</sub> |        |
|-----------------------|--------|-------------------------|--------|------------------------|--------|-------------------------|--------|
| Drug [ $\mu$ M]       | effect | Drug [ $\mu$ M]         | effect | Drug [ $\mu$ M]        | effect | Drug [ $\mu$ M]         | effect |
| FA 0.5                | 0.01   | FA 0.5                  | 0.001  | FA 1.0                 | 0.01   | FA 1.0                  | 0.001  |
| FA 0.25               | 0.001  | FA 0.25                 | 0.0001 | FA 0.25                | 0.001  | FA 0.25                 | 0.0001 |
| FU 4.0                | 0.28   | FU 2.0                  | 0.11   | FU 6.0                 | 0.1    | FU 6.0                  | 0.1    |
| FU 1.0                | 0.15   | FU 1.0                  | 0.03   | FU 4.0                 | 0.06   | FU 4.0                  | 0.06   |

**Supplementary Table 2.** Combinatory index (CI) single drug doses and effect for FF/OX/SN in CRC cells.

| DLD1 CI <sub>FF/OX/SN</sub> |        | HCT116 CI <sub>FF/OX/SN</sub> |        | SW620 CI <sub>FF/OX/SN</sub> |        | LS174T CI <sub>FF/OX/SN</sub> |        |
|-----------------------------|--------|-------------------------------|--------|------------------------------|--------|-------------------------------|--------|
| Drug [ $\mu$ M]             | effect | Drug [ $\mu$ M]               | effect | Drug [ $\mu$ M]              | effect | Drug [ $\mu$ M]               | effect |
| FA 0.5 + 5-FU 2.0           | 0.18   | FA 0.5 + 5-FU 2.0             | 0.11   | FA 0.25 + 5-FU 6.0           | 0.14   | FA 0.5 + 5-FU 6.0             | 0.14   |
| FA 0.25 + 5-FU 1.0          | 0.09   | FA 0.25 + 5-FU 1.0            | 0.01   | FA 0.13 + 5-FU 3.0           | 0.02   | FA 0.25 + 5-FU 3.0            | 0.03   |
| SN 0.02                     | 0.33   | SN 0.03                       | 0.18   | SN 0.004                     | 0.17   | SN 0.004                      | 0.27   |
| SN 0.01                     | 0.08   | SN 0.0015                     | 0.01   | SN 0.002                     | 0.01   | SN 0.002                      | 0.001  |
| OX 0.5                      | 0.15   | OX 0.2                        | 0.12   | OX 0.3                       | 0.17   | OX 0.2                        | 0.24   |
| OX 0.25                     | 0.1    | OX 0.1                        | 0.01   | OX 0.15                      | 0.04   | OX 0.1                        | 0.01   |
